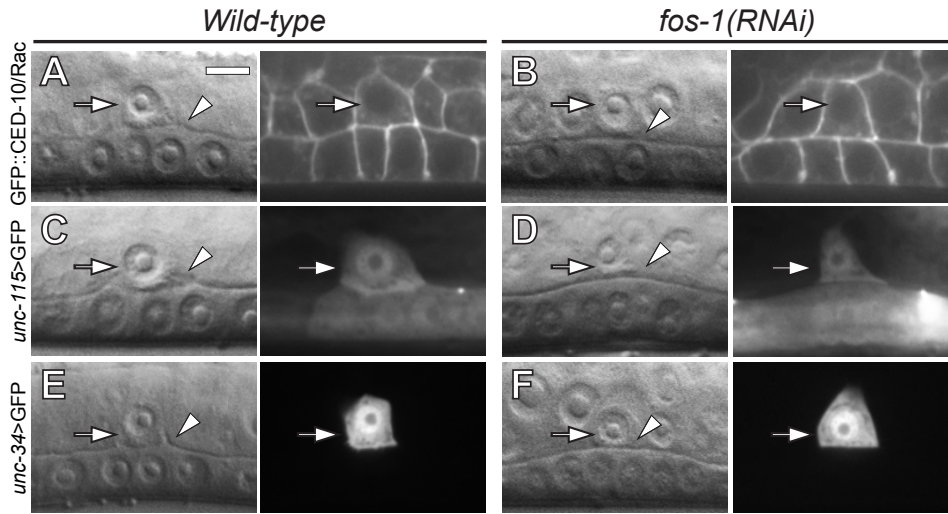

**Fig. S1. FOS-1A does not regulate the expression of UNC-40 effectors.**

DIC images (left) and corresponding fluorescence images (right) are shown at the P6.p four-cell stage. (A) GFP::CED-10 driven by its endogenous promoter is expressed and was localized to the membrane of the wild-type AC. (B) The expression and localization of CED-10 was unaffected (arrow) after *fos-1* RNAi treatment, which blocked AC invasion (arrowhead denotes intact phase dense line representing basement membrane). (C and E) The transcriptional reporters for *unc-115* (*unc-115 > GFP*) and *unc-34* (*unc-34 > GFP*) showed AC expression. (D and F) The expression of transcriptional reporters for *unc-115* and *unc-34* remained unchanged after *fos-1* RNAi treatment. In this and all other supplementary figures, scale bars represent 5  $\mu$ m.

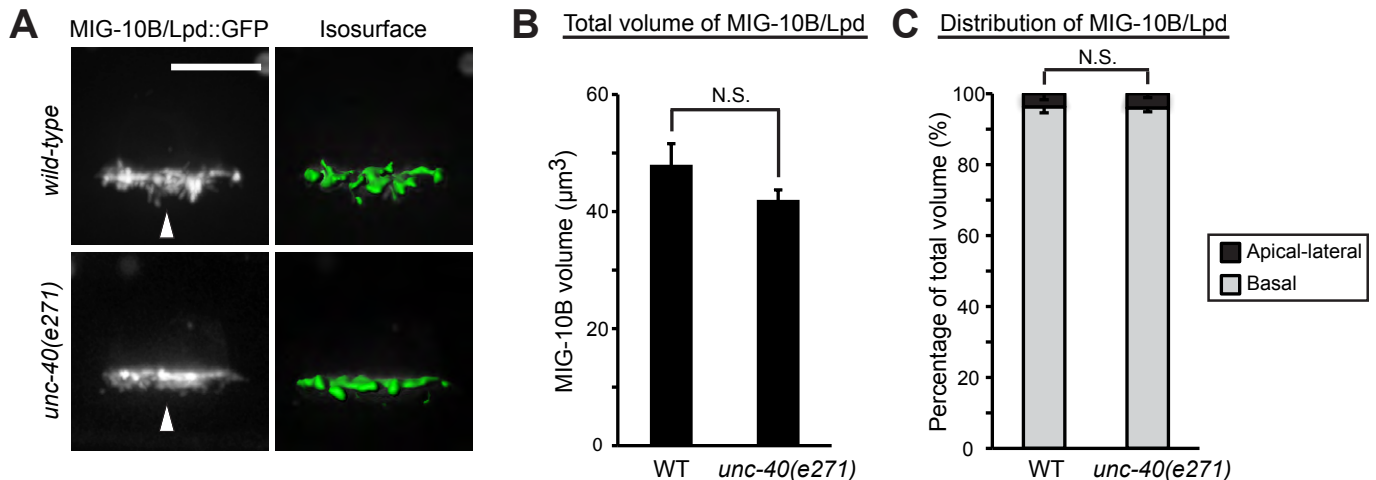

**Fig. S2. MIG-10B localization remains polarized in *unc-40(e271)* mutant ACs.**

(A) Images show 3D reconstructions generated from confocal z-stacks taken in animals at the P6.p four-cell stage. Fluorescence (left) and corresponding isosurface rendering of MIG-10B::GFP localization (right). MIG-10B polarizes to the invasive cell membrane (white arrowheads) in wild-type ACs and *unc-40* mutant ACs at the P6.p four-cell stage. (B) Quantification of the total MIG-10B volume in wild-type and *unc-40(e271)* mutant ACs at the P6.p four-cell stage ( $n \geq 10$  per genotype). (C) The basal (gray) and apical-lateral (black) distribution of MIG-10B within the AC in wild-type animals and *unc-40(e271)* mutants at the P6.p four-cell stage ( $n \geq 10$  per genotype). In this and all other supplementary figures, one asterisk (\*), two asterisks (\*\*), and three asterisks (\*\*\*) indicate statistically-significant differences of  $P < 0.05$ ,  $P < 0.01$  and  $P < 0.001$ , respectively, and N.S. indicates no significant difference (Student's *t*-test). Error bars represent the standard error of the mean. Significant differences relative to wild-type animals are indicated.

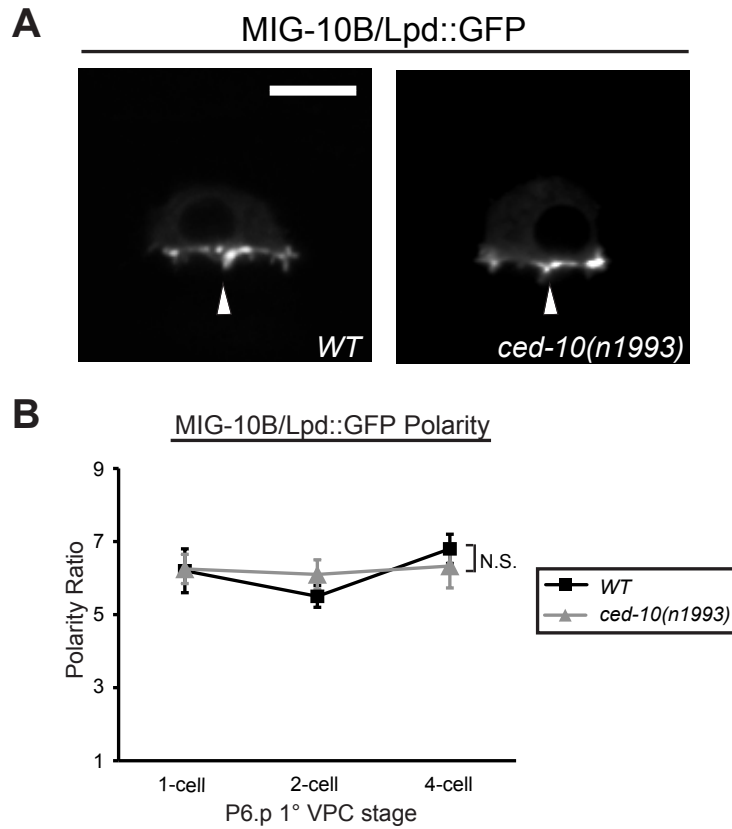

**Fig. S3. MIG-10B localization remains polarized in *ced-10(n1993)* mutant ACs.**

(A) MIG-10B polarizes to the invasive cell membrane (white arrowheads) in wild-type ACs and *ced-10* mutant ACs at the P6.p four-cell stage. (B) Quantification of MIG-10B polarization to the invasive cell membrane in wild-type animals (black squares), *unc-40* mutants (gray triangles) at the P6.p one-, two-, and four-cell stages ( $n \geq 12$  for each stage per genotype). Significant differences relative to wild-type animals are indicated.

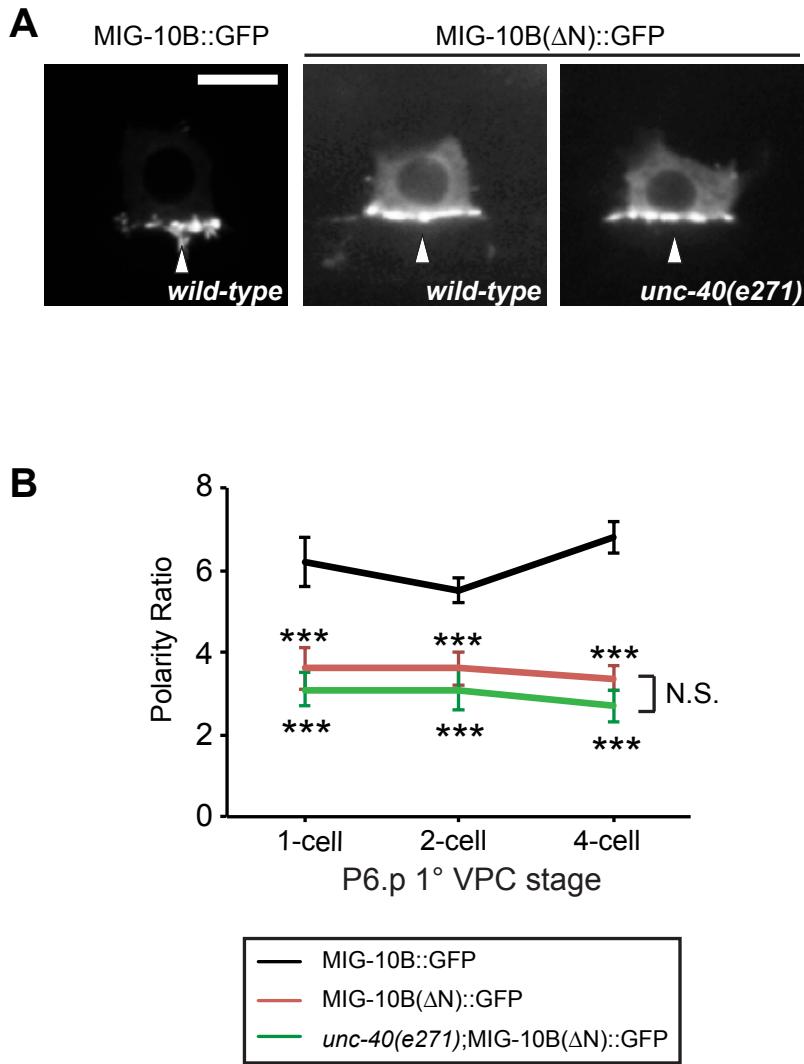

**Fig. S4. The N-terminal domain of MIG-10B promotes localization to the invasive membrane.**

(A) In wild-type ACs, MIG-10B was strongly polarized to the invasive cell membrane (white arrowhead). MIG-10B( $\Delta$ N) showed reduced localization to the invasive cell membrane (white arrowhead), which was not further reduced in *unc-40* mutants. (B) Quantification of polarization of MIG-10B in wild-type animals (black line) and MIG-10B( $\Delta$ N) in wild-type (red line) and *unc-40* (green line) mutant animals at the P6.p one-, two-, and four-cell stages ( $n \geq 12$  for each stage per genotype). Significant differences relative to wild-type animals are indicated.

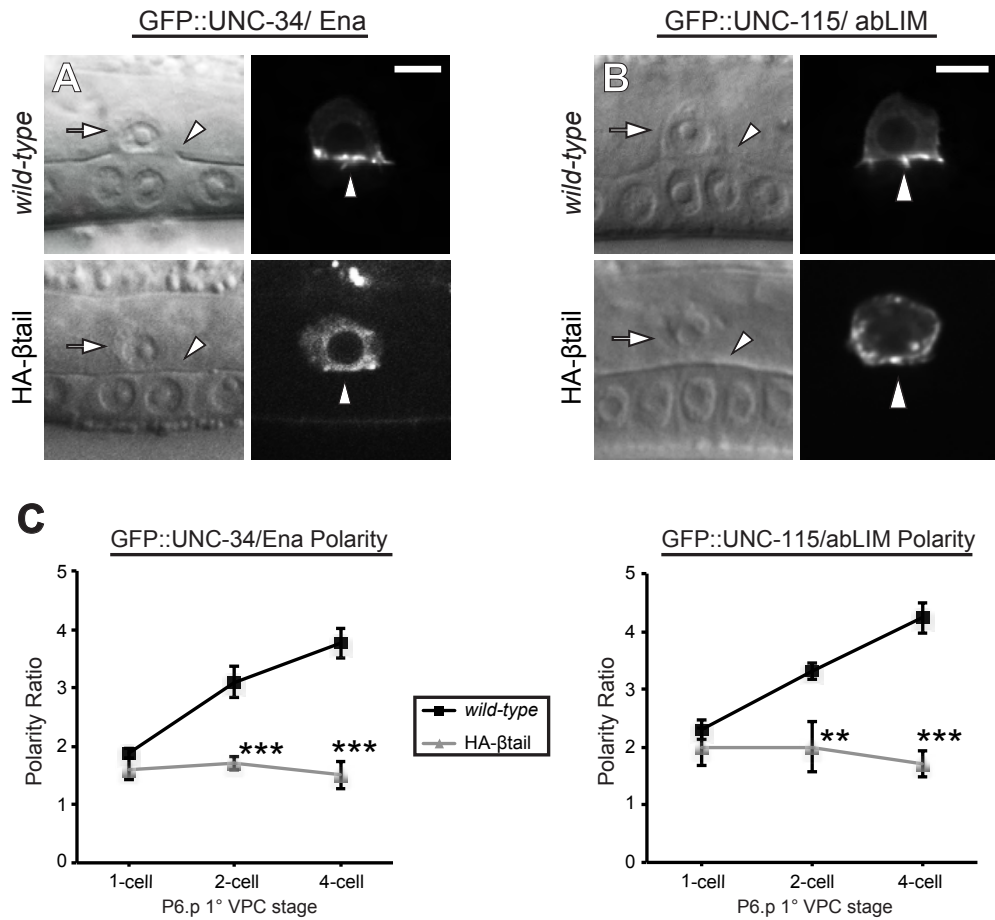

**Fig. S5. Integrin localizes UNC-34 and UNC-115 to the invasive cell membrane.**

(A and B) DIC images (left) and corresponding fluorescence (right). In wild-type ACs, UNC-34 and UNC-115 polarized to the invasive cell membrane (white arrowheads). In contrast, expression of a dominant negative integrin PAT-3  $\beta$  subunit in the AC (*zmp-1* > *HA- tail*) reduced the polarization of UNC-34 and UNC-115 to the invasive membrane. ACs in *HA- tail* animals still adhered to the underlying basement membrane (arrowhead, DIC image). (C) Quantification of UNC-34 and UNC-115 polarization to the invasive cell membrane in wild-type animals (black squares) and *HA- tail* (gray triangles) at the P6.p one-, two-, and four-cell stages ( $n \geq 12$  for each stage per genotype). Significant differences relative to wild-type animals are indicated.

**Table S1.** Primer sequences and templates used for PCR fusions and cloning

| Primer sequence (5'->3')                                | Primer type                                                          | Amplicon                                                       | Template                                                         |
|---------------------------------------------------------|----------------------------------------------------------------------|----------------------------------------------------------------|------------------------------------------------------------------|
| TAATGTGAGTTAGCTCACT<br>CATTAGG                          | Forward                                                              | <i>cdh-3 promoter</i>                                          | pPD107.94/mk62<br>-63                                            |
| AACGATGGATACGCTAACA<br>ACTTGG                           | Forward nested                                                       | <i>cdh-3 promoter</i>                                          | pPD107.94/mk62<br>-63                                            |
| TTTCTGAGCTCGGTACCCTC<br>CAAG                            | Reverse                                                              | <i>cdh-3 promoter</i>                                          | pPD107.94/mk62<br>-63                                            |
| ATGAGTAAAGGAGAAGAA<br>CTTTTAC                           | Forward                                                              | <i>GFP</i>                                                     | pPD95.81 (GFP)                                                   |
| GGAAACAGTTATGTTTGGT<br>ATATTGGG                         | Reverse nested                                                       | <i>GFP</i>                                                     | pPD95.81 (GFP);<br>Plasmid <i>unc-86</i> ><br><i>mig-10::GFP</i> |
| AAGGGCCCCGTACGGCCGAC<br>TA                              | Reverse                                                              | <i>GFP</i>                                                     | pPD95.81 (GFP);<br>Plasmid <i>unc-86</i> ><br><i>mig-10::GFP</i> |
| TTTGTATAGTTCATCCATGC<br>CATGTG                          | Reverse for GFP<br>extension to N-terminus<br>of protein of interest | <i>GFP</i>                                                     | Plasmid <i>cdh-3</i> ><br><i>GFP</i>                             |
| GTGCCCGTAAATCAATACC<br>TAGTC                            | Forward                                                              | <i>unc-34 promoter</i>                                         | N2 genomic<br>DNA                                                |
| GCACTTTTACGGCAGATTTT<br>GTGT                            | Reverse                                                              | <i>unc-34 promoter</i>                                         | N2 genomic<br>DNA                                                |
| GCTCATCCCTGATTACAAG<br>TTT                              | Forward                                                              | <i>unc-115 promoter for unc-115</i><br>> <i>GFP</i>            | N2 genomic<br>DNA                                                |
| CGAAGCACGGAATAAATCA<br>T                                | Forward nested                                                       | <i>unc-115 promoter for unc-115</i><br>> <i>GFP</i>            | N2 genomic<br>DNA                                                |
| GGTATAGAATAGCGGAGAG<br>AGGTCT                           | Reverse                                                              | <i>unc-115 promoter for unc-115</i><br>> <i>GFP</i>            | N2 genomic<br>DNA                                                |
| GACCTCTCTCCGCTATTCTA<br>TACCATGAGTAAAGGAGAA<br>GAACTTTT | Forward GFP extension                                                | <i>GFP for unc-115</i> > <i>GFP</i>                            | pPD95.81 (GFP)                                                   |
| ATGGGCAAAAAATGCGACG<br>TATGT                            | Forward                                                              | <i>unc-115 cDNA for cdh-3</i> ><br><i>GFP::unc-115</i>         | N2 cDNA                                                          |
| GACTTGGAGACAAATAACG<br>GGGAT                            | Reverse                                                              | <i>unc-115 cDNA for cdh-3</i> ><br><i>GFP::unc-115</i>         | N2 cDNA                                                          |
| CGAGATTCCGCGTAGAAGA<br>CAAA                             | Reverse nested                                                       | <i>unc-115 cDNA for cdh-3</i> ><br><i>GFP::unc-115</i>         | N2 cDNA                                                          |
| CATACGTCGCATTTTTTGCC<br>CATTTTGTATAGTTCATCCA<br>TGCCA   | Reverse for GFP with<br><i>unc-115</i> extension                     | <i>GFP for cdh-3</i> > <i>GFP::unc-115</i>                     | Plasmid <i>cdh-3</i> ><br><i>GFP</i>                             |
| CTTGGAGGGTACCGAGCTC<br>AGAAAATGTATCACGATCG<br>ACGG      | Forward <i>cdh-3</i> promoter<br>extension                           | <i>mig-10b::GFP for cdh-3</i> ><br><i>mig-10b::GFP</i>         | Plasmid <i>unc-86</i> ><br><i>mig-10::GFP</i>                    |
| CTTGGAGGGTACCGAGCTC<br>AGAAAATGTCCGAGATTG<br>GCAGTTG    | Forward <i>cdh-3</i> promoter<br>extension                           | <i>mig-10b(ΔN)::GFP for cdh-3</i> ><br><i>mig-10b(ΔN)::GFP</i> | Plasmid <i>unc-86</i> ><br><i>mig-10::GFP</i>                    |

**Table S2.** Extrachromosomal array and integrated strain generation

| <b>Strain Designation</b>          | <b>PCR fusion or plamids</b>                                       | <b>Injection concentration (ng/<math>\mu</math>l)</b> | <b>Co-injection marker</b>      |
|------------------------------------|--------------------------------------------------------------------|-------------------------------------------------------|---------------------------------|
| <i>qyEx196</i>                     | <i>unc-115 &gt; GFP</i> <sup>a</sup>                               | 50                                                    | <i>unc-119+</i>                 |
| <i>qyEx258</i>                     | <i>unc-34 &gt; GFP</i> <sup>b</sup>                                | 50                                                    | <i>unc-119+</i>                 |
| <i>qyEx259</i><br>(overexpression) | <i>cdh-3 &gt; unc-40::GFP</i> <sup>a</sup>                         | 50                                                    | <i>unc-119+, myo-2 &gt; GFP</i> |
| <i>qyEx412</i>                     | <i>cdh-3 &gt; mig-10b(<math>\Delta N</math>)::GFP</i> <sup>a</sup> | 10                                                    | <i>unc-119+, myo-2 &gt; GFP</i> |
| <i>qyIs182</i>                     | <i>cdh-3 &gt; GFP::unc-115</i> <sup>a</sup>                        | 50                                                    | <i>unc-119+</i>                 |
| <i>qyIs183</i>                     | <i>cdh-3 &gt; mig-10b::GFP</i> <sup>a</sup>                        | 10                                                    | <i>unc-119+</i>                 |

<sup>a</sup> PCR fusion product; <sup>b</sup> plasmid
